# Supplementary material
Source: Springer Nature journal article supplement (https://www.springermedizin.de/resource/supplementary/12889_2012_4107_MOESM2_ESM.pdf/9491532)
Supplement: MOESM2 [file 9491532]

Enrollment

Randomized (18 general practices)

Allocated to screening: 8 practices  
((S=5, M=1, L=2),  
N= 5369 patients 65 years or older)

Excluded:  
3267 not frail  
44 having COPD and HF  
247 other<sup>#</sup>

1811 frail patients 65 years or older

Excluded:  
175 no dyspnoea  
779 not willing to participate  
462 no response\*

395 frail patients 65 years or older with  
reduced exercise tolerance and/or exercise  
induced dyspnoea

Questionnaires: MDS and SF36  
Screening with history taking, PE, blood  
tests, ECG, spirometry, echocardiography,  
VAS

- Fill out MDS, SF36 and MRC
- Check of GPs files for new diagnoses and medication changes
- Panel evaluation for definite diagnosis

Allocated to care as usual: 10 practices  
((S=6, M=2, L=2),  
N= 6470 patients 65 years or older)

Excluded:  
3692 not frail  
85 having COPD and HF  
362 other<sup>#</sup>

2331 frail patients 65 years or older

Excluded:  
233 no dyspnoea  
995 not willing to participate  
657 no response\*

446 frail patients 65 years or older with  
reduced exercise tolerance and/or exercise  
induced dyspnoea

Questionnaires: MDS and SF36

- Fill out MDS, SF36 and MRC
- Check of GPs files for new diagnoses and medication changes

Allocation

Follow-up  
6 months
